# Supplementary material for: A novel g-C3N4 nanosheet/Ag3PO4/α-Bi2O3 ternary dual Z-scheme heterojunction with increased light absorption and expanded specific surface area for efficient photocatalytic removal of TC
Source: Royal Society of Chemistry journal article supplement (doi:10.1039/d2dt00737a), 2022-01-01
Supplement: d2dt00737a1.pdf [file d2dt00737a1.pdf]

## Supplementary Information

**A novel g-C<sub>3</sub>N<sub>4</sub> nanosheet/Ag<sub>3</sub>PO<sub>4</sub>/α-Bi<sub>2</sub>O<sub>3</sub> ternary dual Z-scheme heterojunction with increasing light absorption and expanded specific surface area for efficient photocatalytic removal TC**

Zongyu Zhang<sup>a</sup>, Xiuling Xue<sup>a\*</sup>, Xiaoyi Chen <sup>a</sup>.

College of Chemical Engineering, Huaqiao University, Xiamen, 361021, China

\* Corresponding Author: Xiuling Xue

E-mail: xueling@hqu.edu.cn

Telephone: +86-592-6162300

Fax: +86-5926162300

## Section 1. Supporting Figures and Tables

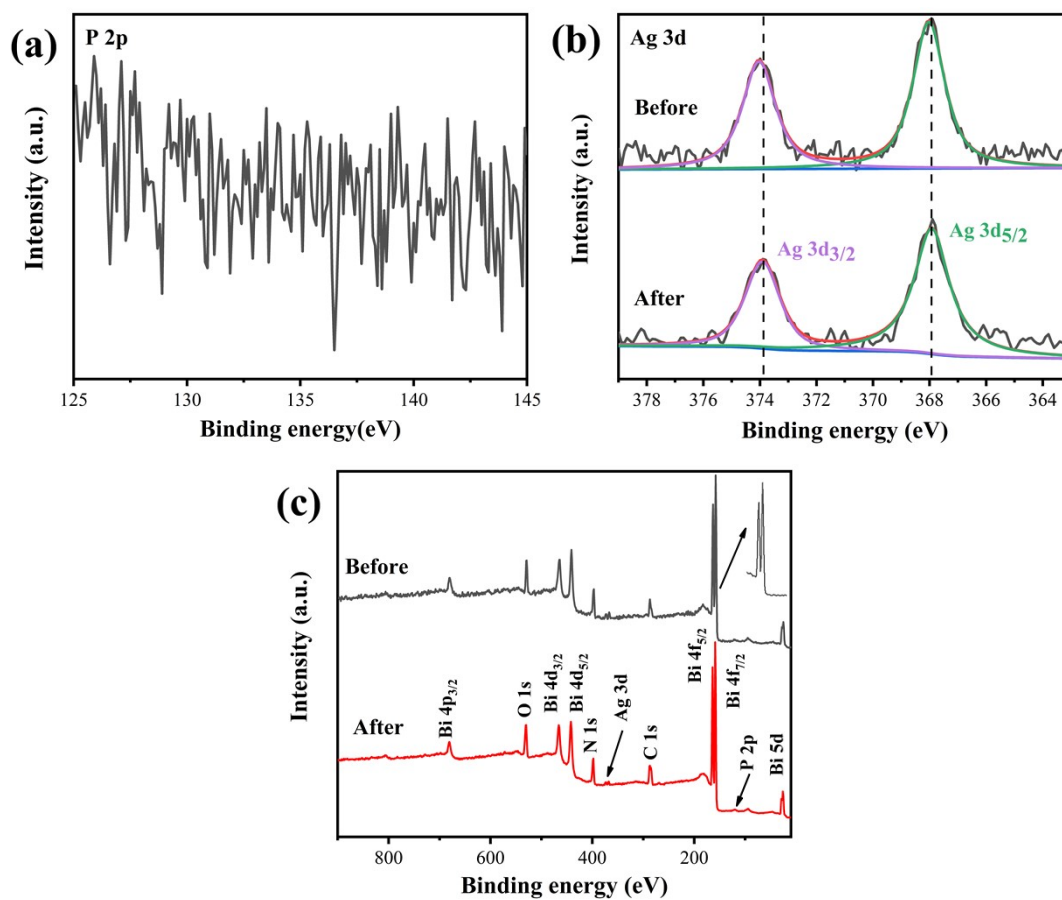

**Fig. S1** The XPS spectra of P 2p (a) of CNN/AP/BO-4 photocatalyst. Ag 3d (b) and survey spectra (c) of fresh and used CNN/AP/BO-4 photocatalyst.

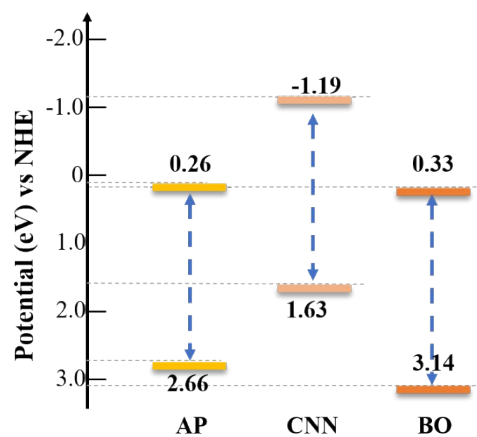

**Fig. S2** Energy band structures of CNN, AP and BO.

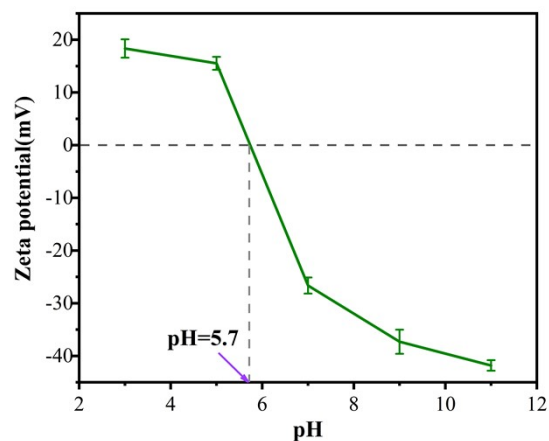

**Fig. S3** Zeta potentials of CNN/AP/BO under different pH conditions.

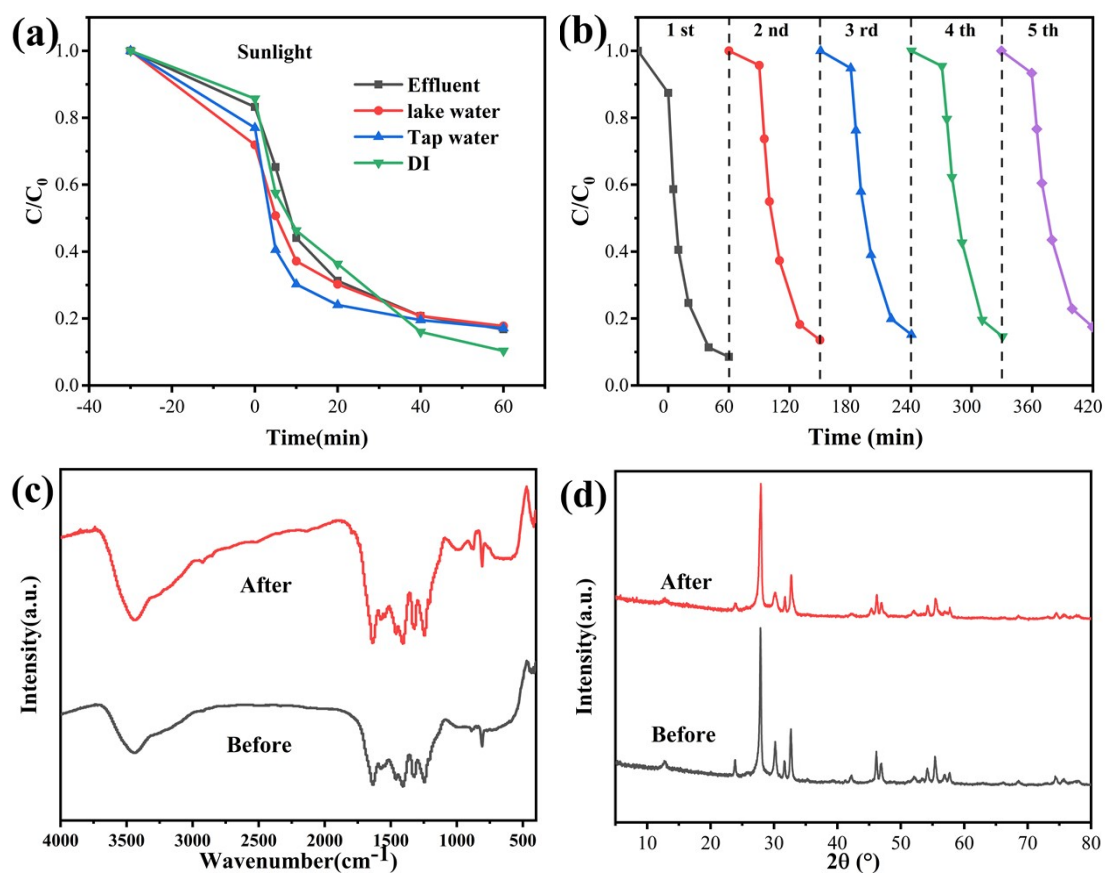

**Fig. S4** (a) Effect of different water body samples condition under sunlight irradiation; (b) stability test on the performance of CNN/AP/BO-4 for TC degradation; (c) FTIR spectra and (d) XRD patterns of fresh and used CNN/AP/BO-4.

**Table S1** Comparison of photocatalytic performance with other previously reported photocatalysts for tetracycline ( TC) degradation

| Materials                              | Light source Xe lamp/W | Catalys t (g/L) | Concentration (mg/L) | Volume (mL) | Degradation Performance (%) | Refs.        |
|----------------------------------------|------------------------|-----------------|----------------------|-------------|-----------------------------|--------------|
| Ag <sub>3</sub> PO <sub>4</sub> /AgBr- | 300 ( $\lambda >$ )    | 0.5             | 40                   | 100         | 80 (25min)                  | <sup>1</sup> |

|                                                                  |                   |     |    |     |               |      |  |
|------------------------------------------------------------------|-------------------|-----|----|-----|---------------|------|--|
| 20%g-C <sub>3</sub> N <sub>4</sub>                               | 420 nm)           |     |    |     |               |      |  |
| Bi <sub>2</sub> Zr <sub>2</sub> O <sub>7</sub> /g-               | 300 ( $\lambda >$ | 0.5 | 20 | 100 | 86.2 (45min)  | 2    |  |
| C <sub>3</sub> N <sub>4</sub> /Ag <sub>3</sub> PO <sub>4</sub>   | 420 nm)           |     |    |     |               |      |  |
| g-                                                               | LED10(4           | 1   | 20 | 100 | 90 (150min)   | 3    |  |
| C <sub>3</sub> N <sub>4</sub> /Ag <sub>3</sub> PO <sub>4</sub> - | 00                |     |    |     |               |      |  |
| 1                                                                | nm $<\lambda <$ 7 |     |    |     |               |      |  |
|                                                                  | 00 nm)            |     |    |     |               |      |  |
| Ag <sub>3</sub> PO <sub>4</sub> /g-                              | 300 ( $\lambda >$ | 1   | 10 | 50  | 69(10 min)    | 4    |  |
| C <sub>3</sub> N <sub>4</sub> /MoSe <sub>2</sub>                 | 420 nm)           |     |    |     |               |      |  |
| Ag <sub>3</sub> PO <sub>4</sub> /                                | 300 ( $\lambda >$ | 0.5 | 10 | /   | 88 (120 min)  | 5    |  |
| Co <sub>3</sub> (PO <sub>4</sub> ) <sub>2</sub> /g-              | 420 nm)           |     |    |     |               |      |  |
| C <sub>3</sub> N <sub>4</sub>                                    |                   |     |    |     |               |      |  |
| PNIPAM@Ag                                                        | 800 ( $\lambda >$ | 0.5 | 20 | 100 | 88.96 (120    | 6    |  |
| /Ag <sub>3</sub> PO <sub>4</sub> -                               | 400 nm)           |     |    |     | min)          |      |  |
| 20/CN                                                            |                   |     |    |     |               |      |  |
| Ag <sub>3</sub> PO <sub>4</sub> /NG/g-                           | 100 ( $\lambda >$ | 0.5 | 20 | 50  | 93.6 (90 min) | 7    |  |
| C <sub>3</sub> N <sub>4</sub>                                    | 420 nm)           |     |    |     |               |      |  |
| Bi <sub>2</sub> O <sub>2</sub> CO <sub>3</sub> /g-               | 300 ( $\lambda >$ | 0.2 | 10 | 50  | 95 (60 min)   | 8    |  |
| C <sub>3</sub> N <sub>4</sub> /Bi <sub>2</sub> O <sub>3</sub>    | 420 nm)           |     |    |     |               |      |  |
| WO <sub>3</sub> /g-                                              | 300 ( $\lambda >$ | 1   | 10 | 100 | 80.2 (60 min) | 9    |  |
| C <sub>3</sub> N <sub>4</sub> /Bi <sub>2</sub> O <sub>3</sub>    | 420 nm)           |     |    |     |               |      |  |
| Bi <sub>2</sub> O <sub>3</sub> QDs/g-                            | 300 ( $\lambda >$ | 0.5 | 10 | 100 | 84 (120 min)  | 10   |  |
| C <sub>3</sub> N <sub>4</sub> (ii)                               | 420 nm)           |     |    |     |               |      |  |
| Bi/ $\alpha$ -Bi <sub>2</sub> O <sub>3</sub> /g-                 | 300 ( $\lambda >$ | 1   | 10 | 50  | 90.2 (180     | 11   |  |
| C <sub>3</sub> N <sub>4</sub>                                    | 400 nm)           |     |    |     | min)          |      |  |
| CNN/AP/BO                                                        | 300 ( $\lambda >$ | 1   | 30 | 50  | 91.6 (60min)  | This |  |
|                                                                  | 420 nm)           |     |    |     |               | work |  |

1. H. Yu, D. Wang, B. Zhao, Y. Lu, X. Wang, S. Zhu, W. Qin and M. Huo, *Sep. Purif. Technol.*, 2020, **237**.
2. Z. Qu, Z. Jing, X. Chen, Z. Wang, H. Ren and L. Huang, *Journal of Environmental Sciences*, 2023, **125**, 349-361.
3. Z. Hu, J. Lyu and M. Ge, *Mater. Sci. Semicond. Process.*, 2020, **105**.
4. H. Zhang, G. Tang, X. Wan, J. Xu and H. Tang, *Appl. Surf. Sci.*, 2020, **530**.
5. W. Shi, C. Liu, M. Li, X. Lin, F. Guo and J. Shi, *J. Hazard. Mater.*, 2020, **389**, 121907.
6. L. Sun, Y. Zhou, X. Li, J. Li, D. Shen, S. Yin, H. Wang, P. Huo and Y. Yan, *Chinese Journal of Catalysis*, 2020, **41**, 1573-1588.
7. Q. Zhang, X. Gao, Y. Wang, H. Li, Y. Zhang, Y. Fan and J. Niu, *Mater. Sci. Semicond. Process.*, 2019, **104**.
8. C. Wu, H. Zuo, H. Du, S. Zhang, L. Wang and Q. Yan, *Sep. Purif. Technol.*, 2022, **282**.
9. L. Jiang, X. Yuan, G. Zeng, J. Liang, X. Chen, H. Yu, H. Wang, Z. Wu, J. Zhang and T. Xiong, *Appl. Catal., B*, 2018, **227**, 376-385.

10. Y. Liang, W. Xu, J. Fang, Z. Liu, D. Chen, T. Pan, Y. Yu and Z. Fang, *Appl. Catal., B*, 2021, **295**.
11. D. Chen, S. Wu, J. Fang, S. Lu, G. Zhou, W. Feng, F. Yang, Y. Chen and Z. Fang, *Sep. Purif. Technol.*, 2018, **193**, 232-241.
